# Supplementary material for: Improving Polygenic Risk Score Based Drug Response Prediction Using Transfer Learning
Source: Research Square preprint supplement (doi:10.21203/rs.3.rs-6173450/v1), 2025-03-13
Supplement: Supplementary file 1 [file 7f0e1480aa6805351bd97efa.docx]

Supplementary Materials for

**Improving Polygenic Risk Score Based Drug Response Prediction Using Transfer Learning**

Youshu Cheng1#, Song Zhai2#, Wujuan Zhong2, Rachel Marceau West2, Judong Shen2*

1Department of Biostatistics, Yale University, New Haven, CT 06520, USA

2Biostatistics and Research Decision Sciences, Merck & Co., Inc., Rahway, NJ 07065, USA

# These authors contributed equally to this work

* To whom correspondence should be addressed

Correspondence: [judong.shen@merck.com](mailto:judong.shen@merck.com) (J.S.)

**This file includes:**

Supplementary Figures S1-S7

Supplementary Tables S1-S3

# Supplementary Figures

**
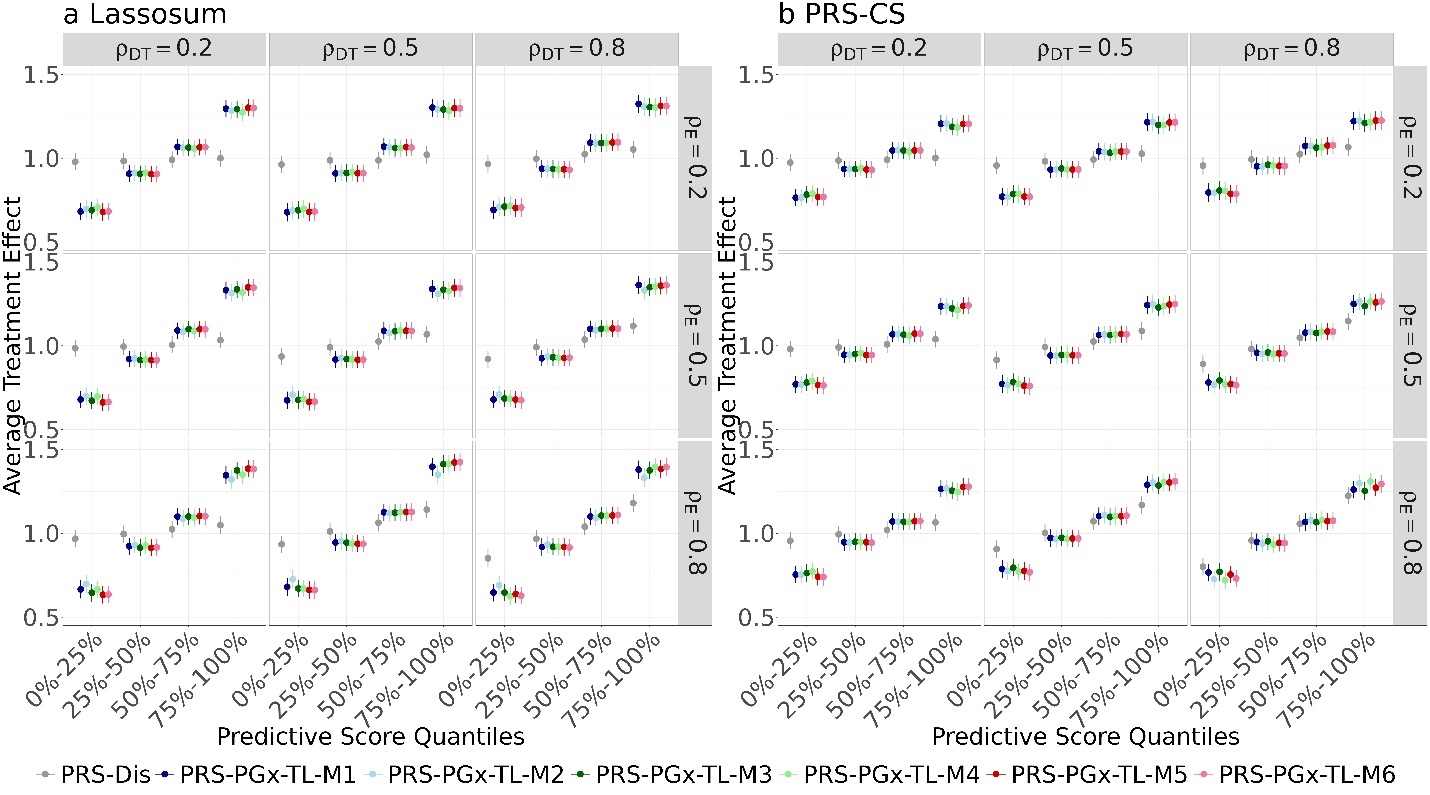
**

# Figure S1 Simulation based patient stratification comparisons between disease PRS methods and PRS-PGx-TL method with different implementation strategies (M1 – M6) for (a) Lassosum, and (b) PRS-CS. , , pcausal = 0.01, , .


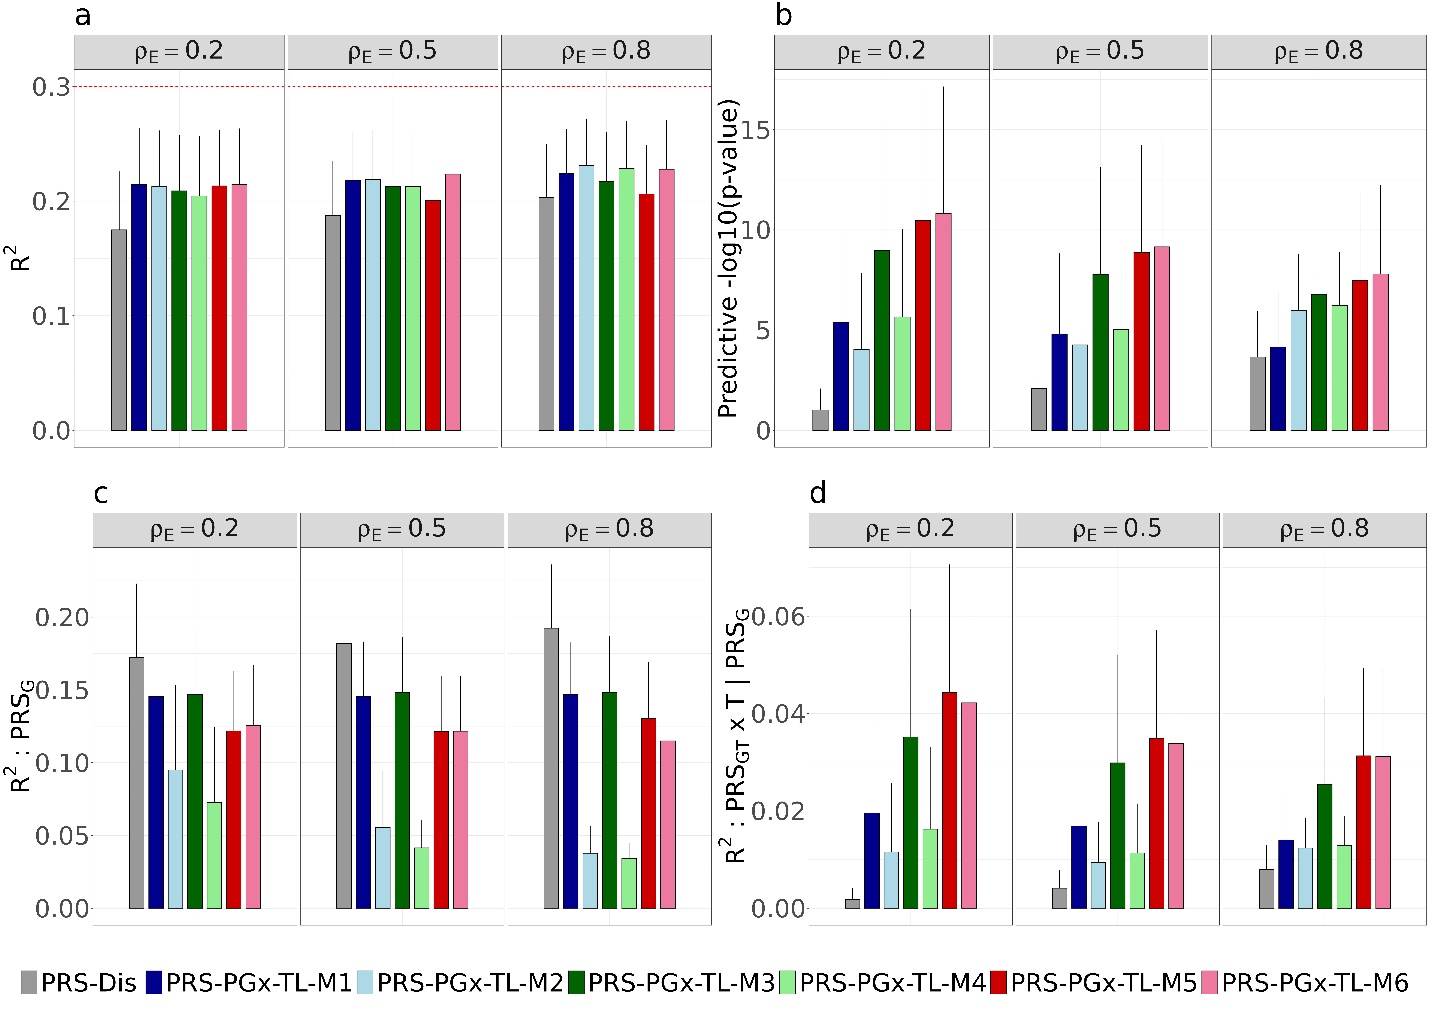


# Figure S2 Simulation results based on C+T baseline disease PRS method in terms of (a) overall , (b) predictive p-value, (c) partial explained by the term, and (d) partial explained by the term (conditional on ). , , pcausal = 0.01, , .


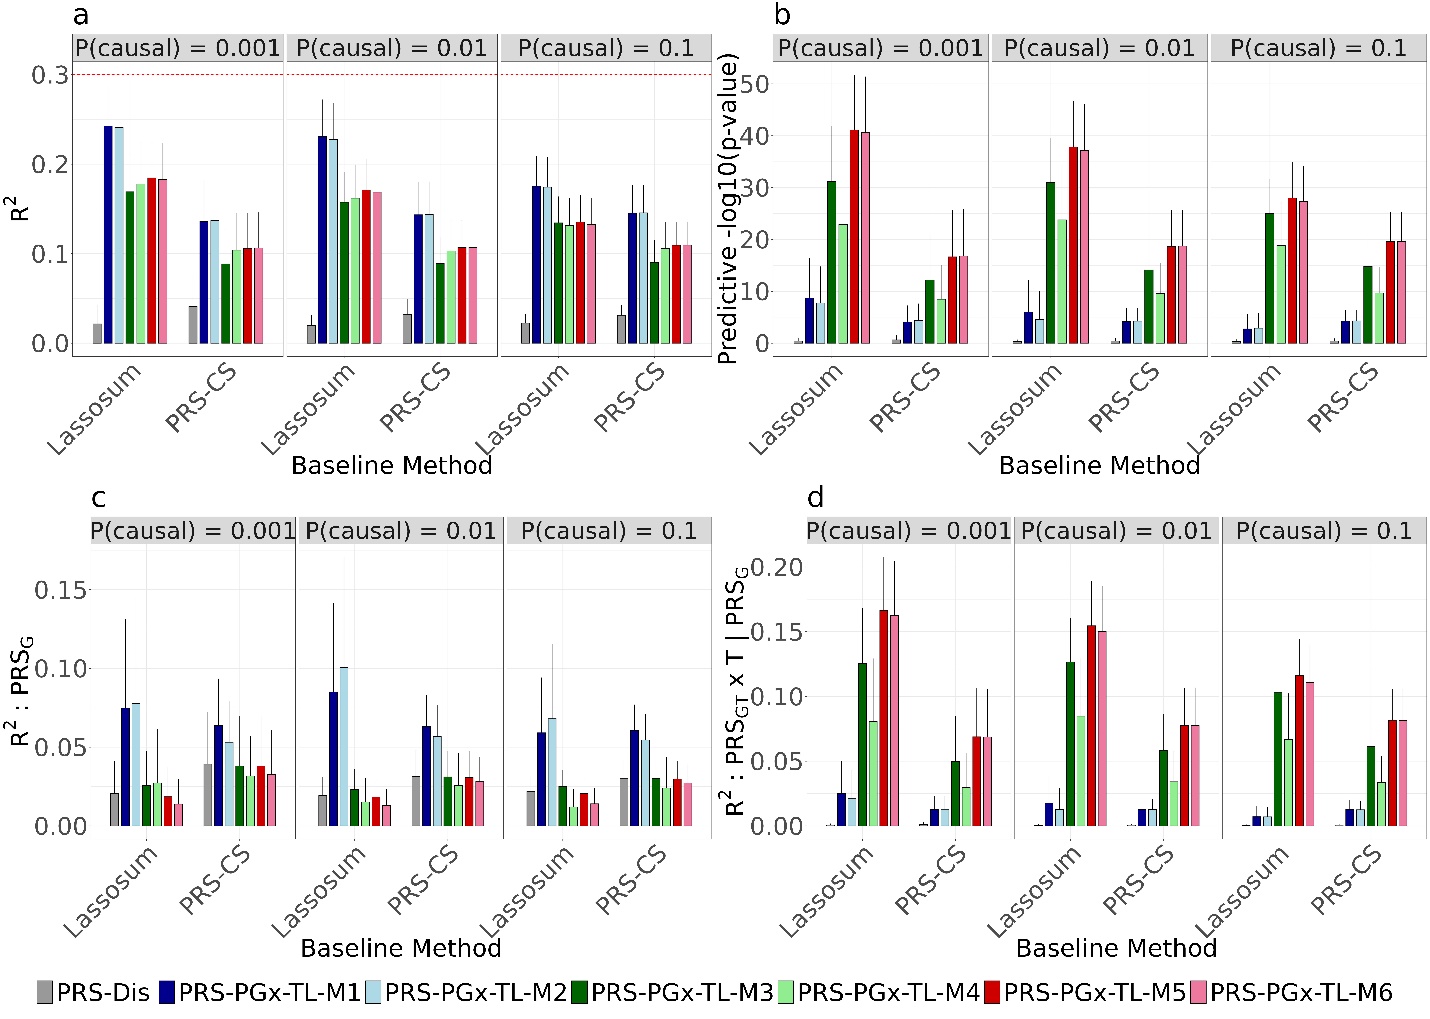


# Figure S3 Simulation based performance comparisons between disease PRS methods (Lassosum, and PRS-CS) and PRS-PGx-TL method with different implementation strategies (M1 – M6). Methods are compared in terms of (a) overall , (b) predictive p-value, (c) partial explained by the term, and (d) partial explained by the term (conditional on ). , , pcausal , , .


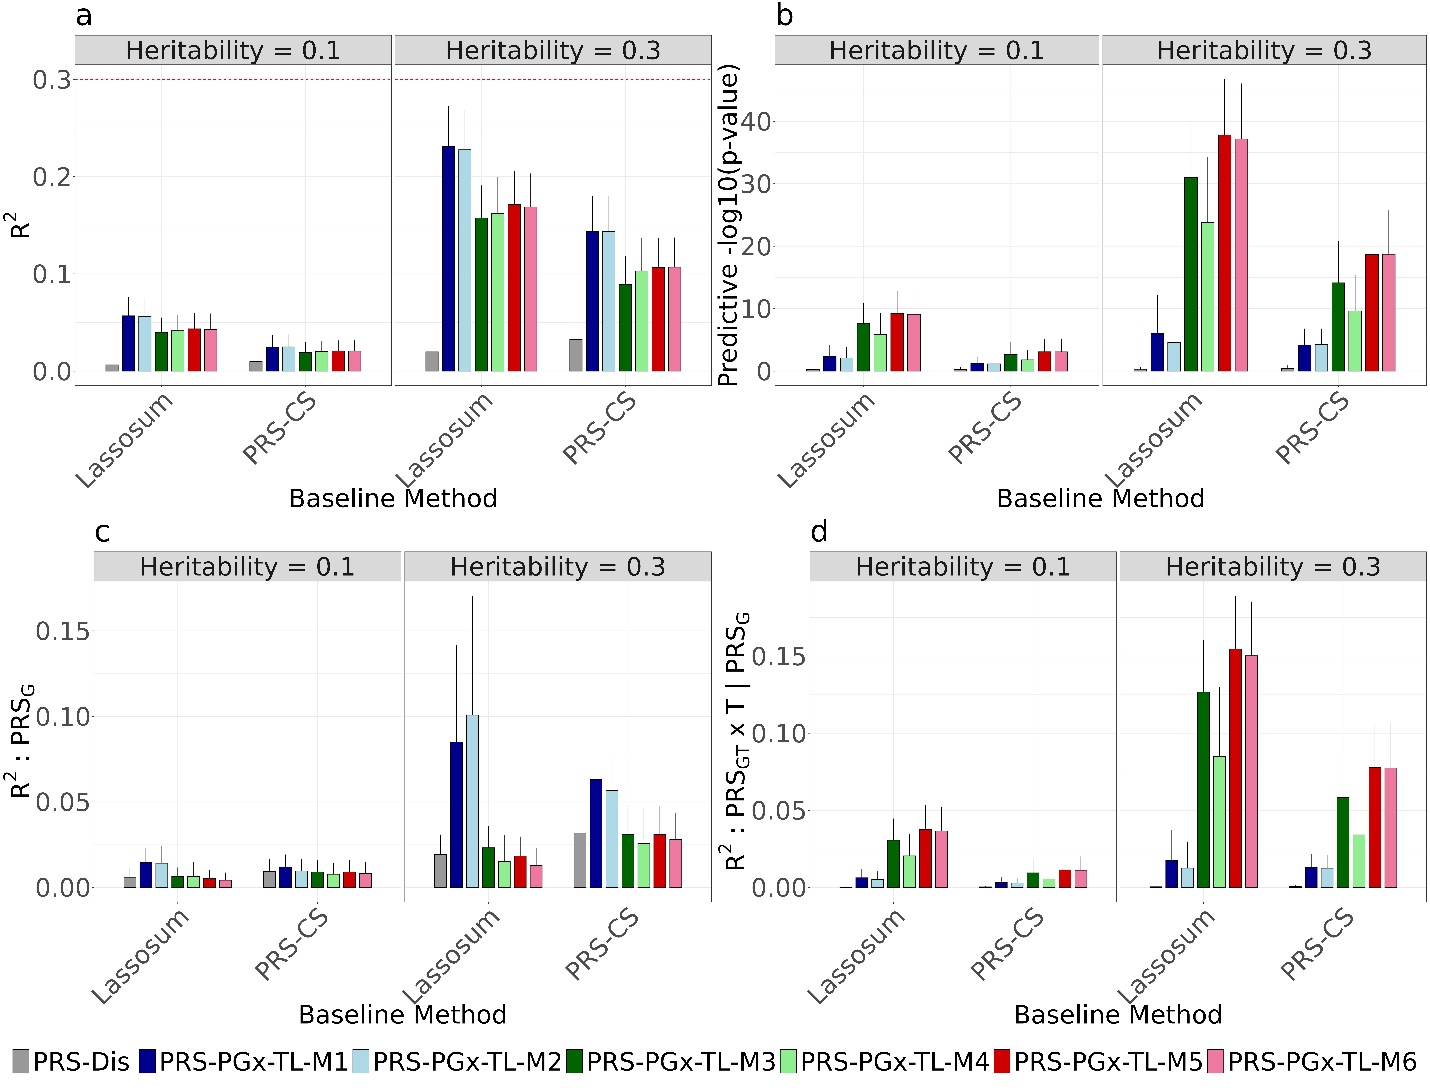


# Figure S4 Simulation based performance comparisons between disease PRS methods (Lassosum, and PRS-CS) and PRS-PGx-TL method with different implementation strategies (M1 – M6). Methods are compared in terms of (a) overall , (b) predictive p-value, (c) partial explained by the term, and (d) partial explained by the term (conditional on ). , , pcausal = 0.01, , .


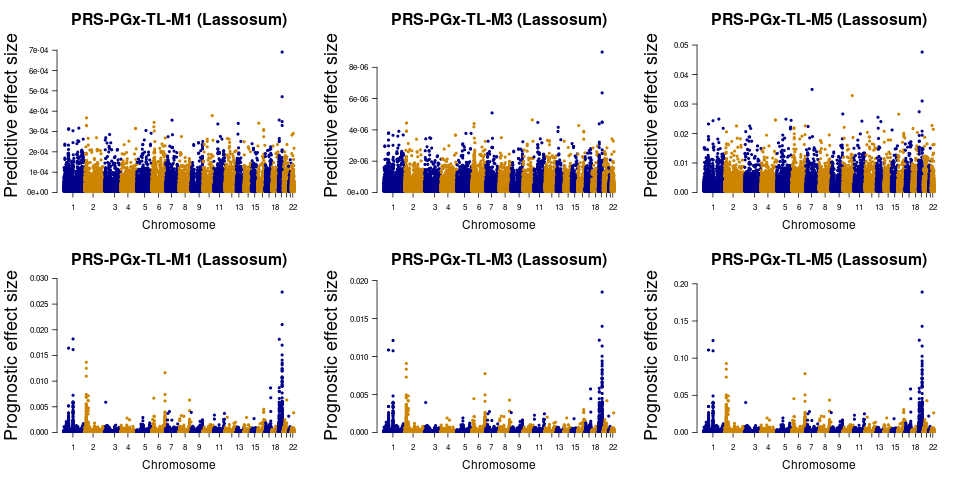


# Figure S5 Manhattan plots of prognostic and predictive effect sizes for PRS-PGx-TL-M1/M3/M5 using Lassosum as the baseline method from the PRS analysis of the IMPROVE-IT PGx GWAS data.


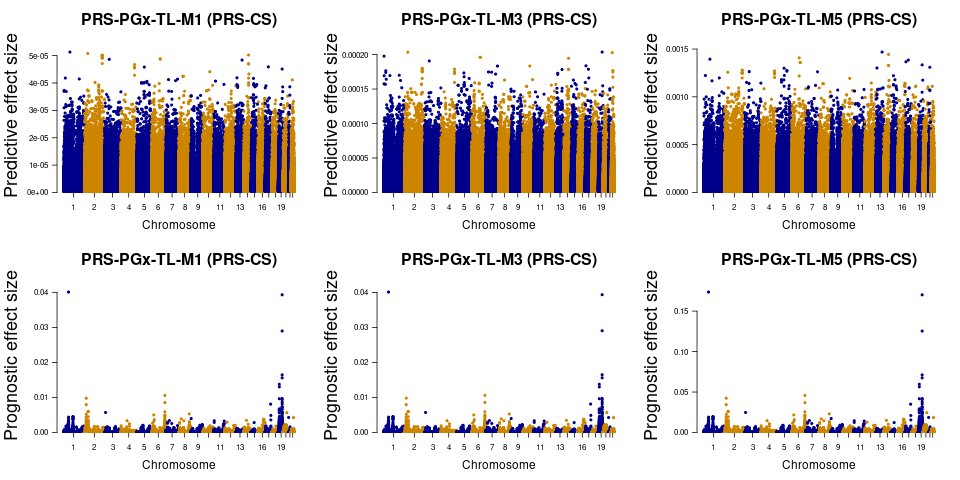


# Figure S6 Manhattan plots of prognostic and predictive effect sizes for PRS-PGx-TL-M1/M3/M5 using PRS-CS as the baseline method from the PRS analysis of the IMPROVE-IT PGx GWAS data.


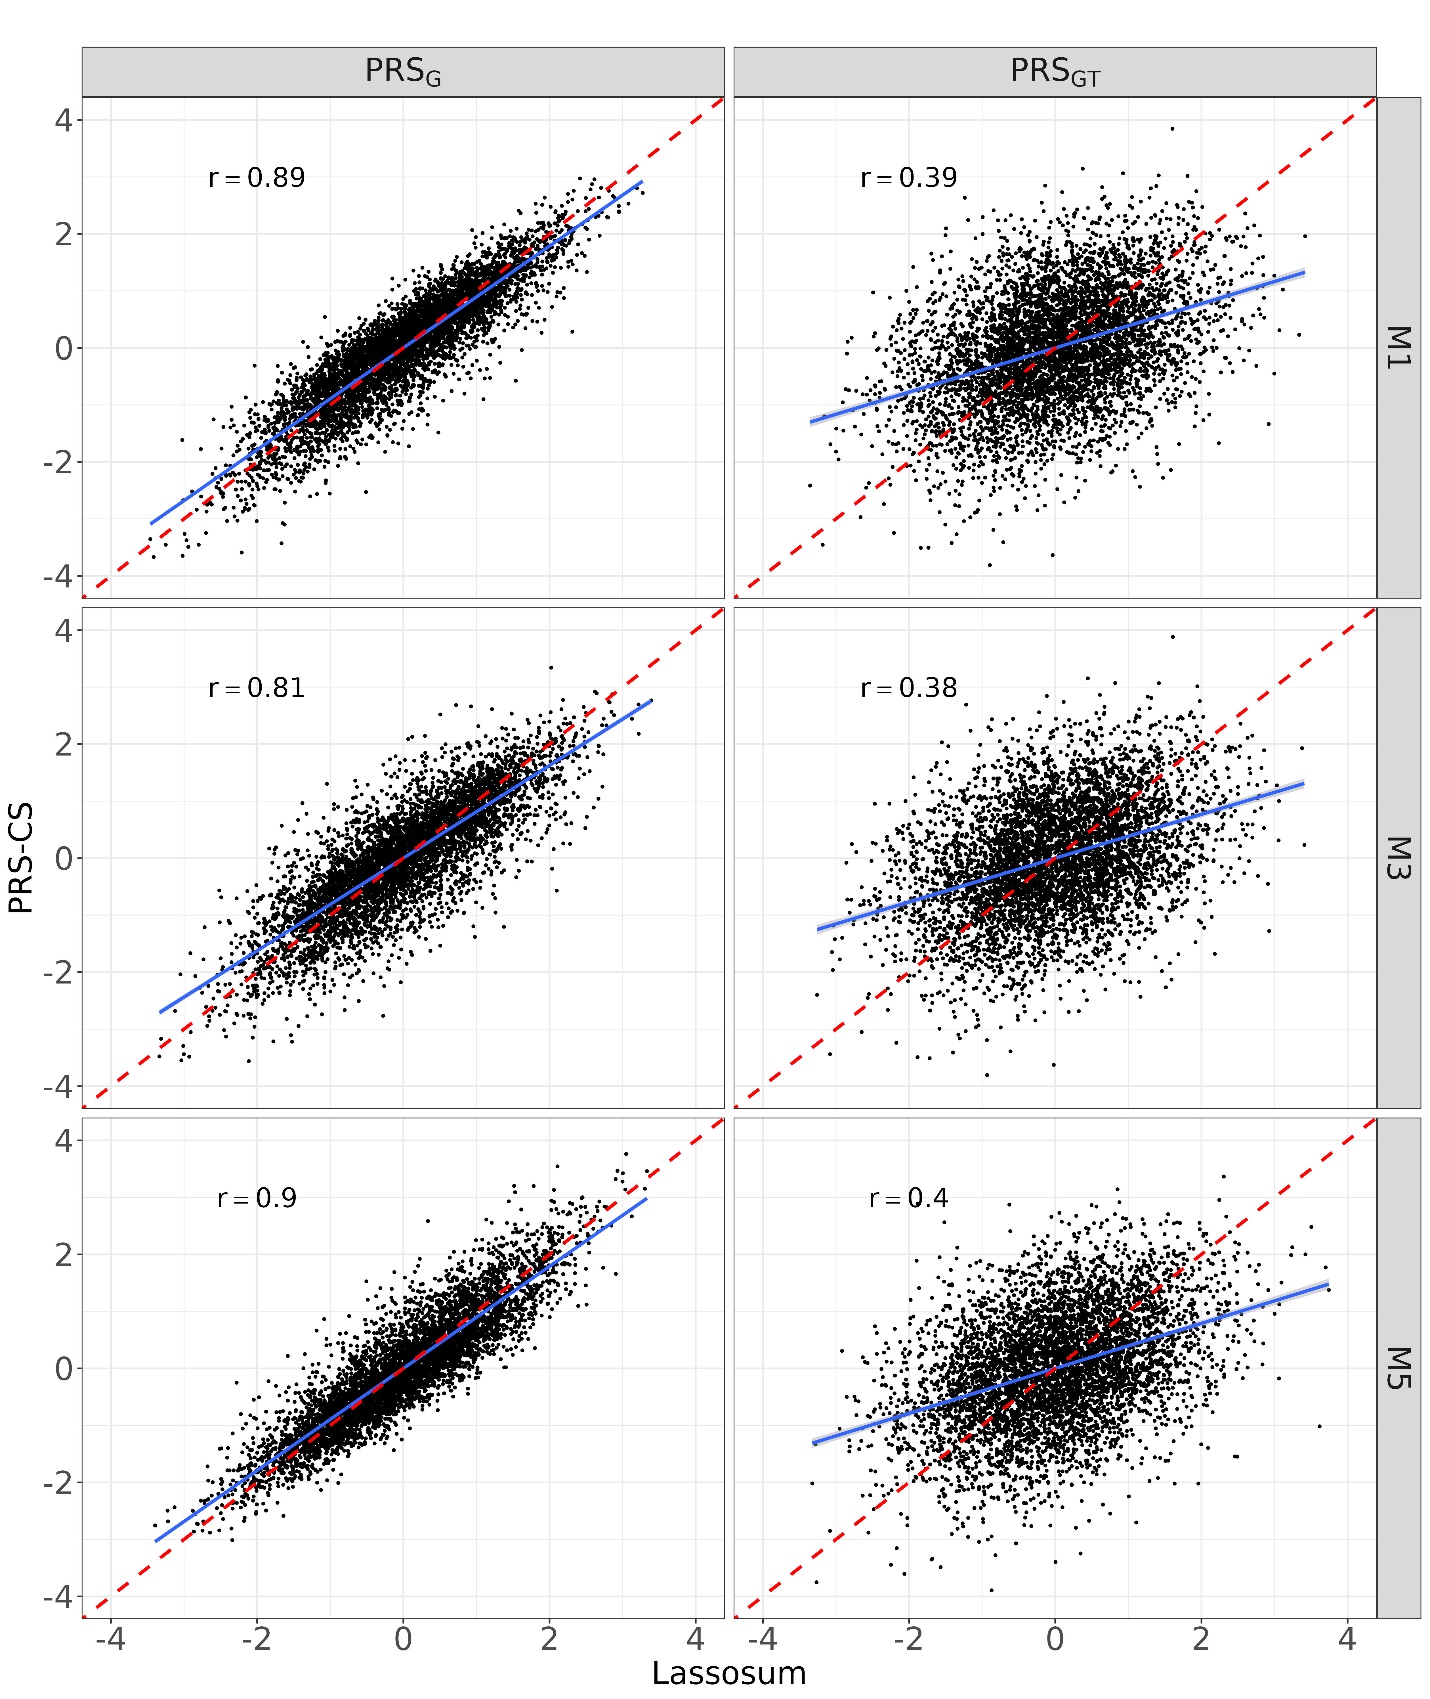


# Figure S7 Scatter plots of PRSG from Lassosum vs. PRSG from PRS-CS and PRSGT from PRS-CS vs. PRSGT from PRS-CS for PRS-PGx-TL-M1, -M3 and -M5, respectively from the PRS analysis of the IMPROVE-IT PGx GWAS data. r stands for the Pearson’s correlation.

# Supplementary Tables

# Table S1 Simulation parameters setup.

| **Parameter** | **Description** | **Value** |
| --- | --- | --- |
| p | Proportion of causal SNPs | 0.1, 0.01, 0.001 |
|  | Heritability to explain the trait (in the base cohort) | 0.5 |
|  | Correlation between prognostic and predictive effects in PGx GWAS | 0.2, 0.5, 0.8 |
|  | Effect correlation between the trait in the base cohort and the drug response in the target cohort | 0.2, 0.5, 0.8 |
| G | IMPROVE-IT PGx GWAS genotype matrix with N patients and m SNPs | N = 5,000; m = 20,854 SNPs on chr 19 |
|  | Coefficient of treatment | 1 |
|  | Heritability to explain the drug response (in the target cohort) | 0.1, 0.3 |
|  | Scaling factor of predictive effect (so that prognostic and predictive effects may have different scales) | 0.5, 1, 5 |

# Table S2 Information about top 20 SNPs ranked by their absolute predictive effect sizes, estimated by PRS-PGx-TL-M1/M3/M5, respectively from the PRS analysis of the IMPROVE-IT PGx GWAS data. Lassosum was used as the baseline disease PRS method.

| M1 | | | | M3 | | | | M5 | | | |
| --- | --- | --- | --- | --- | --- | --- | --- | --- | --- | --- | --- |
| chr | SNP | BP | Gene | chr | SNP | BP | Gene | chr | SNP | BP | Gene |
| 19 | rs7254892 | 45389596 | *PVRL2* | 19 | rs7254892 | 45389596 | *PVRL2* | 19 | rs7254892 | 45389596 | *PVRL2* |
| 19 | rs7412 | 45412079 | *APOE* | 19 | rs7412 | 45412079 | *APOE* | 7 | rs1362234 | 75588366 | *POR* |
| 10 | rs11196299 | 115073097 | *-* | 7 | rs1362234 | 75588366 | *POR* | 10 | rs11196299 | 115073097 | *-* |
| 2 | rs2723147 | 23618209 | *KLHL29* | 10 | rs11196299 | 115073097 | *-* | 19 | rs7412 | 45412079 | *APOE* |
| 19 | rs35918857 | 10254234 | *DNMT1* | 19 | rs3208856 | 45296806 | *CBLC* | 19 | rs35918857 | 10254234 | *DNMT1* |
| 7 | rs1362234 | 75588366 | *POR* | 19 | rs445925 | 45415640 | *APOE* | 9 | rs11137198 | 140638534 | *EHMT1* |
| 19 | rs3208856 | 45296806 | *CBLC* | 11 | rs3136524 | 46750525 | *F2* | 16 | rs210711 | 12611017 | *SNX29* |
| 6 | rs6935708 | 29416652 | *OR11A1* | 2 | rs2723147 | 23618209 | *KLHL29* | 13 | rs3751432 | 41044128 | *LINC00598* |
| 16 | rs210711 | 12611017 | *SNX29* | 6 | rs6935708 | 29416652 | *OR11A1* | 1 | rs11576216 | 179733859 | *FAM163A* |
| 13 | rs4473067 | 44689605 | *LINC00390* | 19 | rs35918857 | 10254234 | *DNMT1* | 5 | rs7714291 | 111161642 | *NREP* |
| 11 | rs3136524 | 46750525 | *F2* | 16 | rs210711 | 12611017 | *SNX29* | 4 | rs4610314 | 175240518 | *CEP44* |
| 19 | rs445925 | 45415640 | *APOE* | 6 | rs2281027 | 26446705 | *BTN3A3* | 4 | rs17060463 | 175241378 | *CEP44* |
| 2 | rs1530046 | 23623283 | *KLHL29* | 13 | rs4473067 | 44689605 | *LINC00390* | 5 | rs10043715 | 173594472 | *NSG2* |
| 2 | rs2577747 | 23624756 | *KLHL29* | 2 | rs1530046 | 23623283 | *KLHL29* | 1 | rs12401944 | 109239079 | *PRPF38B* |
| 6 | rs2281027 | 26446705 | *BTN3A3* | 2 | rs2577747 | 23624756 | *KLHL29* | 11 | rs7952632 | 95711345 | *MAML2* |
| 1 | rs11576216 | 179733859 | *FAM163A* | 1 | rs11576216 | 179733859 | *FAM163A* | 13 | rs549431 | 75874682 | *TBC1D4* |
| 4 | rs4610314 | 175240518 | *CEP44* | 16 | rs17666927 | 72143414 | *DHX38* | 1 | rs11591147 | 55505647 | *PCSK9* |
| 4 | rs17060463 | 175241378 | *CEP44* | 13 | rs3751432 | 41044128 | *LINC00598* | 22 | rs5752079 | 25597842 | *CRYBB3* |
| 1 | rs17112640 | 56161325 | *RP11-466L17.1* | 16 | rs17666993 | 72146666 | *DHX38* | 6 | rs11964205 | 163418400 | *PACRG* |
| 1 | rs17112655 | 56168803 | *RP11-466L17.1* | 1 | rs17112640 | 56161325 | *RP11-466L17.1* | 2 | rs12621976 | 144106558 | *ARHGAP15* |

# Table S3 Information about top 20 SNPs ranked by their absolute predictive effect sizes, estimated by PRS-PGx-TL-M1/M3/M5, respectively from the PRS analysis of the IMPROVE-IT PGx GWAS data. PRS-CS was used as the baseline disease PRS method.

| M1 | | | | M3 | | | | M5 | | | |
| --- | --- | --- | --- | --- | --- | --- | --- | --- | --- | --- | --- |
| chr | SNP | BP | Gene | chr | SNP | BP | Gene | chr | SNP | BP | Gene |
| 1 | rs10493495 | 72722584 | *NEGR1* | 19 | rs7254892 | 45389596 | *PVRL2* | 13 | rs12429177 | 93071017 | *GPC5* |
| 2 | rs17023938 | 39773237 | *AC007246.3* | 2 | rs17023938 | 39773237 | *AC007246.3* | 14 | rs759591 | 77551671 | *RP11-7F17.4* |
| 14 | rs759591 | 77551671 | *RP11-7F17.4* | 22 | rs5752851 | 29398459 | *ZNRF3* | 6 | rs6932200 | 91787815 | *-* |
| 2 | rs6754838 | 214375447 | *SPAG16* | 1 | rs6662635 | 1220425 | *SCNN1D* | 1 | rs10493495 | 72722584 | *NEGR1* |
| 2 | rs16850465 | 214430651 | *SPAG16* | 6 | rs9322774 | 104303973 | *-* | 17 | rs9905211 | 37260188 | *PLXDC1* |
| 2 | rs2130057 | 214249895 | *SPAG16* | 6 | rs9322775 | 104304350 | *-* | 17 | rs3935950 | 7974179 | *ALOX12B* |
| 2 | rs1503380 | 214324201 | *SPAG16* | 14 | rs759591 | 77551671 | *RP11-7F17.4* | 6 | rs9322774 | 104303973 | *-* |
| 2 | rs10498007 | 214345142 | *SPAG16* | 3 | rs3732514 | 56667480 | *FAM208A* | 6 | rs9322775 | 104304350 | *-* |
| 2 | rs16850416 | 214354140 | *SPAG16* | 17 | rs3935950 | 7974179 | *ALOX12B* | 19 | rs7254892 | 45389596 | *PVRL2* |
| 2 | rs6709713 | 214378285 | *SPAG16* | 7 | rs8176059 | 142651354 | *KEL* | 14 | rs2021766 | 77546692 | *RP11-7F17.4* |
| 6 | rs9322774 | 104303973 | *-* | 10 | rs12098564 | 86953327 | *RP11-181F12.1* | 14 | rs204982 | 77553969 | *RP11-7F17.4* |
| 6 | rs9322775 | 104304350 | *-* | 2 | rs6754838 | 214375447 | *SPAG16* | 21 | rs17811387 | 30413855 | *USP16* |
| 3 | rs3732514 | 56667480 | *FAM208A* | 2 | rs16850465 | 214430651 | *SPAG16* | 13 | rs3809376 | 31308722 | *ALOX5AP* |
| 13 | rs12429177 | 93071017 | *GPC5* | 4 | rs3792614 | 164532973 | *MARCH1* | 5 | rs157237 | 89389697 | *-* |
| 2 | rs7587811 | 214457257 | *SPAG16* | 17 | rs9905211 | 37260188 | *PLXDC1* | 2 | rs6754838 | 214375447 | *SPAG16* |
| 14 | rs2021766 | 77546692 | *RP11-7F17.4* | 14 | rs2021766 | 77546692 | *RP11-7F17.4* | 2 | rs16850465 | 214430651 | *SPAG16* |
| 14 | rs204982 | 77553969 | *RP11-7F17.4* | 14 | rs204982 | 77553969 | *RP11-7F17.4* | 5 | rs7708937 | 123169574 | *-* |
| 4 | rs3792614 | 164532973 | *MARCH1* | 13 | rs12429177 | 93071017 | *GPC5* | 4 | rs3792614 | 164532973 | *MARCH1* |
| 17 | rs9905211 | 37260188 | *PLXDC1* | 2 | rs2130057 | 214249895 | *SPAG16* | 5 | rs10519734 | 123191183 | *-* |
| 5 | rs1422174 | 92194417 | *-* | 22 | rs8138016 | 36702149 | *MYH9* | 3 | rs3732514 | 56667480 | *FAM208A* |
